# Supplementary material for: Respiratory, thoracic, and mediastinal adverse events associated with ticagrelor: A pharmacovigilance study based on FDA adverse event reporting system
Source: Research Square preprint supplement (doi:10.21203/rs.3.rs-6798394/v1), 2025-06-17
Supplement: Supplementary file 1 [file 5f8826f8f68330b7d8d2f5ec.docx]

Supplementary Material

# Supplementary Tables

**Supplementary Table S1**.Calculation of ROR.

|  | Reports with target AE | Reports without target AE |
| --- | --- | --- |
| Reports with ticagrelor | a | b |
| Reports without ticagrelor | c | d |

a, number of reports containing both the target drug (ticagrelor) and target AE; b, number of reports containing other AEs of the target drug; c, number of reports containing the target AE of other drugs; d, number of reports containing other drugs and other AEs.

AEs, Adverse Events; ROR, Reporting Odds Ratio; CI, confidence interval.

The calculation formulas are shown below:

1. ROR=ad/b/c
2. 95%CI=eln(ROR)±1.96(1/a+1/b+1/c+1/d)^0.5

**Supplementary Table S2**.Criteria and relevant scores to prioritize AEs emerged from disproportionality analysis.

| Criterium | **2 points** | **1 point** | **0 point** |
| --- | --- | --- | --- |
| Reporting rate (cases/non-cases) | >10% | 1-10% | 0-1% |
| Signal stability (consistency across disproportionality analyses) | 3 of 3 | 2 of 3 | 1 of 3 |
| Reported case fatality rate (proportion of reports with death as outcome) | >50% | 25-50% | <25% |
| Clinical relevance  (serious likely drug-attributable AEs) | DME | IME | None |

AEs, adverse events; DME,designated medical event;IME,important medical event

**Supplementary Table S3**. Signal strength of reports of ticagrelor at the SOC level in FAERS database.

| System Organ Class (SOC) | ticagrelor cases  reporting SOC | ROR(95% CI) |
| --- | --- | --- |
| General disorders and administration site conditions | 8394 | 0.95 ( 0.92 - 0.97 ) |
| Respiratory, thoracic and mediastinal disorders* | 5779 | 2.59 ( 2.52 - 2.66 ) |
| Cardiac disorders* | 5394 | 4.43 ( 4.31 - 4.56 ) |
| Gastrointestinal disorders* | 4479 | 1.04 ( 1.01 - 1.08 ) |
| Nervous system disorders* | 4479 | 1.05 ( 1.02 - 1.09 ) |
| Injury, poisoning and procedural complications | 4363 | 0.91 ( 0.88 - 0.94 ) |
| Investigations | 2902 | 0.93 ( 0.89 - 0.96 ) |
| Vascular disorders* | 2374 | 2.25 ( 2.15 - 2.34 ) |
| Psychiatric disorders | 1794 | 0.61 ( 0.58 - 0.64 ) |
| Skin and subcutaneous tissue disorders | 1595 | 0.57 ( 0.54 - 0.6 ) |
| Musculoskeletal and connective tissue disorders | 1516 | 0.56 ( 0.53 - 0.59 ) |
| Blood and lymphatic system disorders | 1185 | 1.39 ( 1.31 - 1.47 ) |
| Infections and infestations | 1098 | 0.4 ( 0.38 - 0.42 ) |
| Renal and urinary disorders | 861 | 0.93 ( 0.87 - 0.99 ) |
| Metabolism and nutrition disorders | 723 | 0.66 ( 0.62 - 0.71 ) |
| Eye disorders | 647 | 0.63 ( 0.59 - 0.68 ) |
| Product issues | 597 | 0.75 ( 0.69 - 0.81 ) |
| Neoplasms benign, malignant and unspecified (Incl cysts and polyps) | 466 | 0.34 ( 0.31 - 0.38 ) |
| Hepatobiliary disorders | 318 | 0.69 ( 0.62 - 0.77 ) |
| Ear and labyrinth disorders | 309 | 1.43 ( 1.28 - 1.6 ) |
| Immune system disorders | 263 | 0.46 ( 0.41 - 0.52 ) |
| Surgical and medical procedures | 183 | 0.26 ( 0.23 - 0.31 ) |
| Reproductive system and breast disorders | 154 | 0.37 ( 0.32 - 0.43 ) |
| Social circumstances | 119 | 0.54 ( 0.45 - 0.65 ) |
| Endocrine disorders | 43 | 0.33 ( 0.25 - 0.45 ) |
| Congenital, familial and genetic disorders | 13 | 0.08 ( 0.05 - 0.15 ) |
| Pregnancy, puerperium and perinatal conditions | 5 | 0.02 ( 0.01 - 0.06 ) |

* indicates statistically significant signals in algorithm. ROR, reporting odds ratio; CI, confidence interval.
